# Supplementary material for: Controllable synthesis of multi-shelled SiO2@C@NiCo2O4 yolk–shell composites for enhancing microwave absorbing properties
Source: Royal Society of Chemistry journal article supplement (doi:10.1039/d1nj03897d), 2021-01-01
Supplement: d1nj03897d1.pdf [file d1nj03897d1.pdf]

## Supporting Information

Controllable synthesis of multi-shelled  $\text{SiO}_2@\text{C}@\text{NiCo}_2\text{O}_4$  yolk-shell  
composites for enhancing microwave absorbing properties

Shanshan Wang,<sup>a#</sup> Huanhuan Zhu,<sup>a#</sup> Qingze Jiao,<sup>ab</sup> Xiaoguang Jiao,<sup>a</sup> Shikai Qin,<sup>a</sup> Quan Shi,<sup>a</sup>

Caihong Feng,<sup>a</sup> Hansheng Li,<sup>a</sup> Daxin Shi,<sup>a</sup> Qin Wu<sup>a</sup> and Yun Zhao<sup>a\*</sup>

<sup>a</sup>*School of Chemistry and Chemical Engineering, Beijing Institute of Technology, Beijing  
100081, China.*

<sup>b</sup>*School of Materials and the Environment, Beijing Institute of Technology, Zhuhai, Zhuhai  
519085, China.*

<sup>#</sup>*Shanshan Wang and Huanhuan Zhu contributed equally to this work*

### Corresponding Authors

\*Yun Zhao. E-mail: [zhaoyun@bit.edu.cn](mailto:zhaoyun@bit.edu.cn) Tel: +86-10-68918979

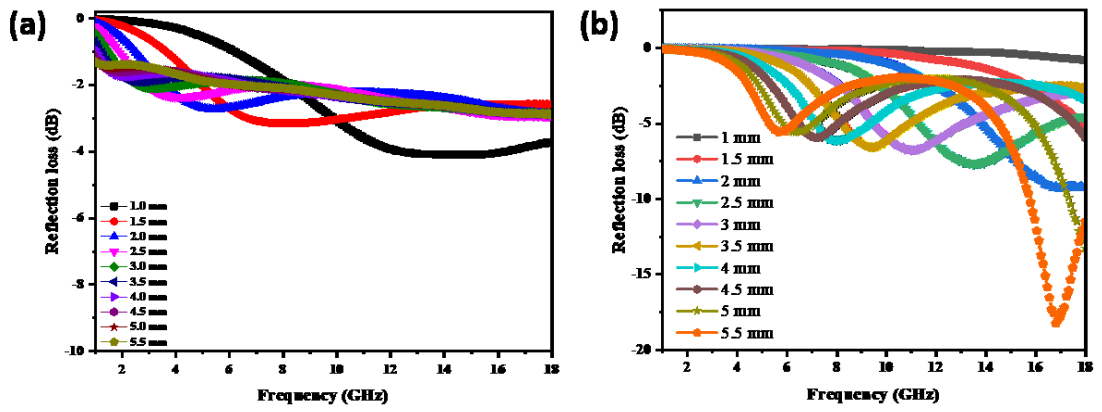

Fig. S1. The reflection loss curves dependence on the frequency and the thickness of (a) pure C and (b) the mixture of SiO<sub>2</sub>@C and NiCo<sub>2</sub>O<sub>4</sub> with the composition of 1:3.
